# Supplementary figures and images for: Automated recruitment and randomisation for an efficient randomised controlled trial in primary care
Source: Springer Nature journal article supplement (doi:10.1186/s13063-018-2723-3), 2018-06-26

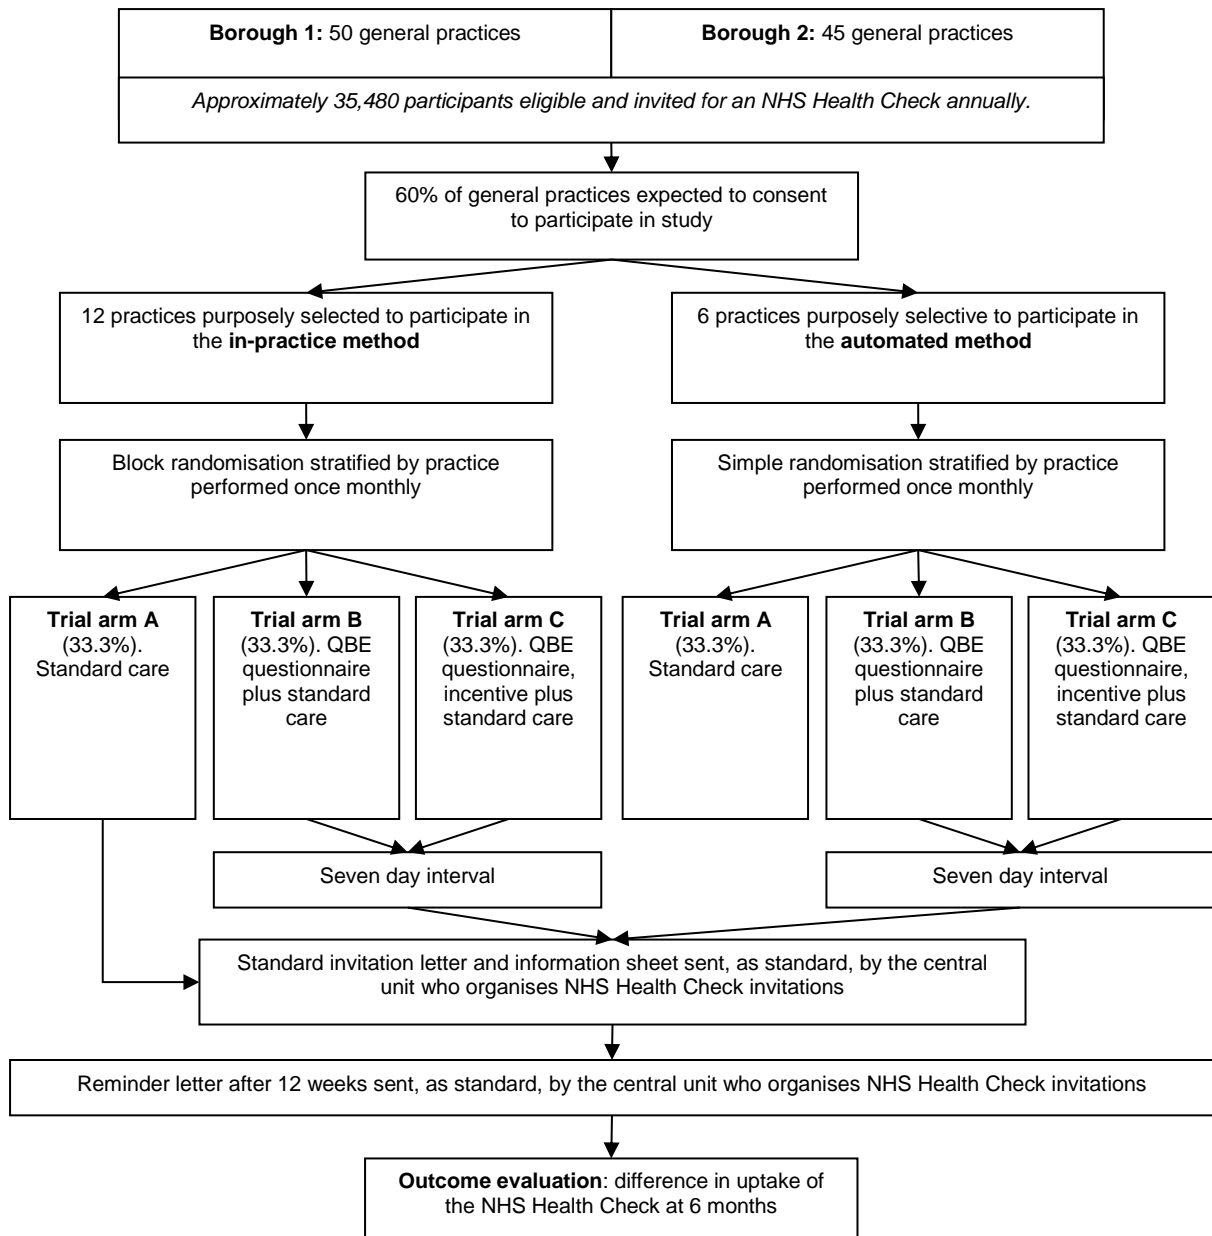

Supplement: MOESM1 [file 13063_2018_2723_MOESM1_ESM.pdf]
